CORRECTION

# Correction: Altered Blood Biomarker Profiles in Athletes with a History of Repetitive Head Impacts

Alex P. Di Battista, Shawn G. Rhind, Doug Richards, Nathan Churchill, Andrew J. Baker, Michael G. Hutchison

The penultimate sentence of the Measures section should have cited reference 41 instead of 39.  
In the Funding section, the name of the funder CIMVHR should be listed as “Canadian Institute for Military and Veteran Health Research (CIMVHR)”.

## Reference

1. Di Battista AP, Rhind SG, Richards D, Churchill N, Baker AJ, Hutchison MG (2016) Altered Blood Biomarker Profiles in Athletes with a History of Repetitive Head Impacts. PLoS ONE 11(7): e0159929. doi: [10.1371/journal.pone.0159929](https://doi.org/10.1371/journal.pone.0159929) PMID: [27458972](https://pubmed.ncbi.nlm.nih.gov/27458972/)

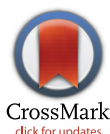

## OPEN ACCESS

**Citation:** Di Battista AP, Rhind SG, Richards D, Churchill N, Baker AJ, Hutchison MG (2016) Correction: Altered Blood Biomarker Profiles in Athletes with a History of Repetitive Head Impacts. PLoS ONE 11(10): e0164912. doi:10.1371/journal.pone.0164912

**Published:** October 11, 2016

**Copyright:** © 2016 Di Battista et al. This is an open access article distributed under the terms of the [Creative Commons Attribution License](https://creativecommons.org/licenses/by/4.0/), which permits unrestricted use, distribution, and reproduction in any medium, provided the original author and source are credited.
